# Supplementary material for: A novel type-II NiCo-LDH/CeO2 heterojunction for highly efficient photocatalytic H2 production
Source: Royal Society of Chemistry journal article supplement (doi:10.1039/d2nj02848d), 2022-01-01
Supplement: d2nj02848d1.pdf [file d2nj02848d1.pdf]

## Supplementary Information

### **A novel type-II NiCo-LDH/CeO<sub>2</sub> heterojunction for highly efficient photocatalytic H<sub>2</sub> production**

Jing Xu<sup>\*123</sup>, Xinyu Liu<sup>1</sup>, LinYing Hu<sup>1</sup>, Zezhong Li<sup>1</sup>, Yue Ma<sup>1</sup>

1. School of Chemistry and Chemical Engineering, North Minzu University, Yinchuan 750021, P. R. China
2. Ningxia Key Laboratory of Solar Chemical Conversion Technology, North Minzu University, Yinchuan 750021, P. R. China
3. Key Laboratory of Chemical Engineering and Technology, State Ethnic Affairs Commission, North Minzu University, Yinchuan 750021, P. R. China

*Email: [wgyxj2000@163.com](mailto:wgyxj2000@163.com)*

### **1. Detail of material characterization and performance measurements**

#### **1.1 Material characterization**

The crystal structure of photocatalyst was recorded by X-ray diffractometer. The structure and morphology of the photocatalyst were observed by scanning electron microscope (SEM) and transmission electron microscope (TEM). The chemical elements and valence states of the samples were studied by X-ray photoelectron spectroscopy (XPS). The UV-Vis diffuse reflectivity spectra (UV-vis DRS) of the photocatalyst were recorded using BaSO<sub>4</sub> as the back and back of the UV visible spectrometer. At 77 K, the BET specific surface area of the samples was determined by nitrogen adsorption desorption method. The photoluminescence (PL) and time-resolved photoluminescence spectra (TRPL) of the samples were studied by fluorescence spectrophotometry. The electrochemical activity of the samples was determined by electrochemical workstation CHI660E. In 0.2 mol·L Na<sub>2</sub>SO<sub>4</sub> saturated aqueous solution, Ag/AgCl electrode and Pt electrode were used as reference electrode and counter electrode respectively. The working electrode was ITO glass coated with different sample powders with an effective area of 1 cm<sup>2</sup> (1cm×2cm). The photocurrent response curves (I-T) of different samples were measured by intermittent switching on and off xenon lamp with 300 W light source. Electrochemical impedance spectroscopy (EIS) of different samples was measured at a bias of -0.2 V.

#### **1.2 Hydrogen production condition**

The photocatalytic production hydrogen was carried out in an airtight quartz bottle, which

could be degassed and sampled. Usually, 10mg of catalytic material, 20mg of Eosin Y (EY), and 30 mL of TEOA solution containing 10% were weighed and added into a quartz flask. Before the solution was illuminated by visible light, the reactant system was degassed by vacuuming to remove excess gas from the solution. The amount of hydrogen evolution was analyzed by online gas chromatograph (SP 2100, N<sub>2</sub> as carrier).

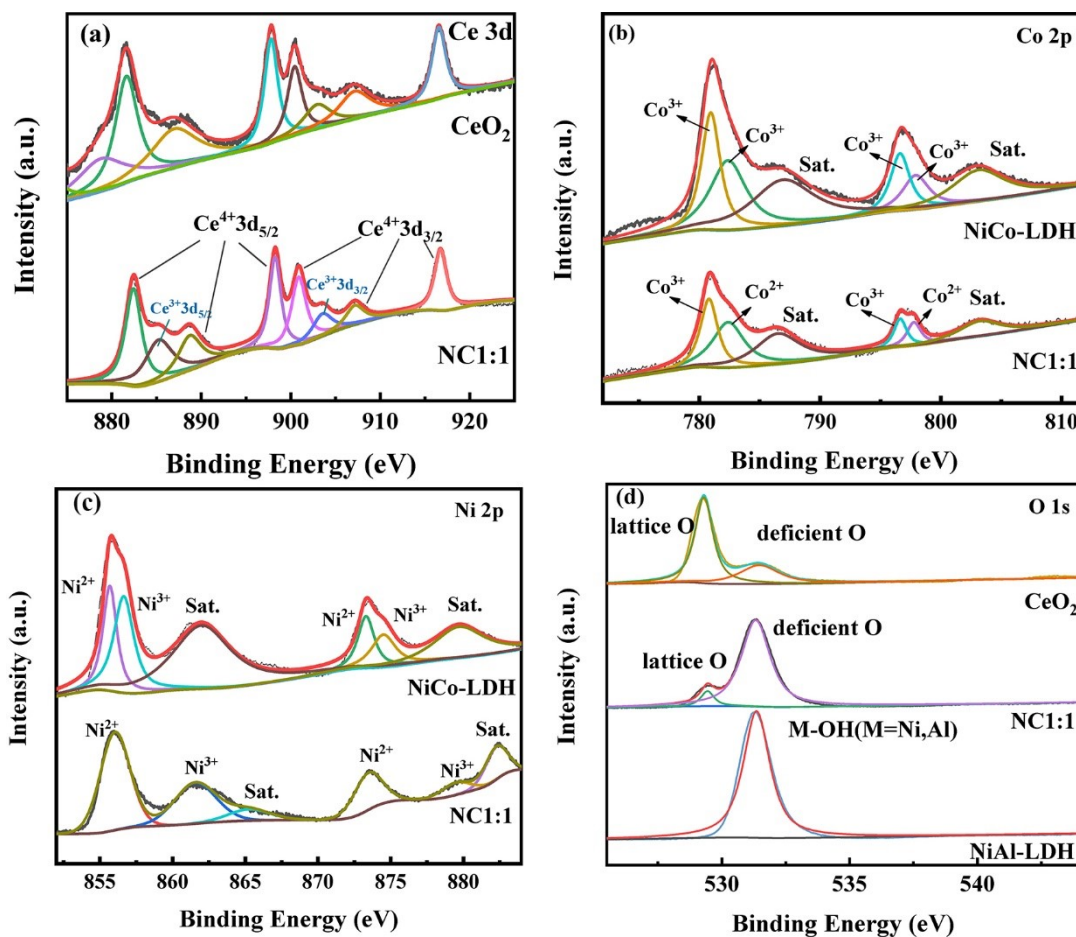

S1. electron transfer contrast

**Table 1.** Comparison of the H<sub>2</sub> production activity of NiCo-LDH/CeO<sub>2</sub> photocatalyst and the recently reported photocatalyst.

| Photocatalyst                                                                | Scavenger                                                            | Light source                       | H <sub>2</sub> evolution rate<br>( $\mu\text{mol g}^{-1} \text{h}^{-1}$ ) | Ref |
|------------------------------------------------------------------------------|----------------------------------------------------------------------|------------------------------------|---------------------------------------------------------------------------|-----|
| NiCo-LDH/CeO <sub>2</sub>                                                    | TEOA                                                                 | 5 W LED lights                     | 2700                                                                      | 本文  |
| NiAl-LDH/MoS <sub>2</sub>                                                    | TEOA                                                                 | 5 W LED lights                     | 4590                                                                      | [1] |
| CoO/NiCo-LDH                                                                 | 0.2 M Na <sub>2</sub> SO <sub>3</sub> and<br>0.2 M Na <sub>2</sub> S | 100 mW cm <sup>-2</sup> Xe<br>lamp | 1500                                                                      | [2] |
| NiAl-LDH/Ti <sub>3</sub> C <sub>2</sub> /g-<br>C <sub>3</sub> N <sub>4</sub> | TEOA                                                                 | 35 W Ballast CAR<br>HID Lamp       | 180                                                                       | [3] |
| Ag-pCN/TiO <sub>2</sub>                                                      | glycerol-water mixture.                                              | 35 W HID Xe lamp                   | 3160                                                                      | [4] |

|                                                      |                 |               |        |     |
|------------------------------------------------------|-----------------|---------------|--------|-----|
| g-C <sub>3</sub> N <sub>4</sub> / CoAl-LDH/          | TEOA            | 300 W Xe lamp | 680.13 | [5] |
| CeO <sub>2</sub> /WO <sub>3</sub>                    | 10 vol% ethanol | 300 W lamp    | 410    | [6] |
| Pt-CeO <sub>2</sub> /g-C <sub>3</sub> N <sub>4</sub> | TEOA            | 300 W Xe-lamp | 860    | [7] |
| CeO <sub>2</sub> /CoS <sub>2</sub>                   | TEOA            | 5 W LED       | 5172   | [8] |

## References

- [1] X. Liu, J. Xu, L. Ma, Y. Liu, L. Hu, Nano-flower S-scheme heterojunction NiAl-LDH/MoS<sub>2</sub> for enhancing photocatalytic hydrogen production, *New Journal of Chemistry*, 46 (2021) 228-238.
- [2] Y. Wang, S. Guo, X. Xin, Y. Zhang, B. Wang, S. Tang, X. Li, Effective interface contact on the hierarchical 1D/2D CoO/NiCo-LDH heterojunction for boosting photocatalytic hydrogen evolution, *Applied Surface Science*, 549 (2021).
- [3] W. Almusattar, M. Tahir, M. Madi, B. Tahir, Fabricating Ti<sub>3</sub>C<sub>2</sub> MXene cocatalyst supported NiAl-LDH/g-C<sub>3</sub>N<sub>4</sub> ternary nanocomposite for stimulating solar photocatalytic H<sub>2</sub> production, *Journal of Environmental Chemical Engineering*, 10 (2022) 108010.
- [4] N. Fajrina, M. Tahir, Engineering approach in stimulating photocatalytic H-2 production in a slurry and monolithic photoreactor systems using Ag-bridged Z-scheme pCN/TiO<sub>2</sub> nanocomposite, *Chemical Engineering Journal*, 374 (2019) 1076-1095.
- [5] J. Zhang, Q. Zhu, L. Wang, M. Nasir, S.-H. Cho, J. Zhang, g-C<sub>3</sub>N<sub>4</sub>/CoAl-LDH 2D/2D hybrid heterojunction for boosting photocatalytic hydrogen evolution, *International Journal of Hydrogen Energy*, 45 (2020) 21331-21340.
- [6] R. Fiorenza, S.A. Balsamo, M. Condorelli, L. D'Urso, G. Compagnini, S. Scire, Solar photocatalytic H-2 production over CeO<sub>2</sub>-based catalysts: Influence of chemical and structural modifications, *Catalysis Today*, 380 (2021) 187-198.
- [7] W. Zou, Y. Shao, Y. Pu, Y. Luo, J. Sun, K. Ma, C. Tang, F. Gao, L. Dong, Enhanced visible light photocatalytic hydrogen evolution via cubic CeO<sub>2</sub> hybridized g-C<sub>3</sub>N<sub>4</sub> composite, *Applied Catalysis B-Environmental*, 218 (2017) 51-59.
- [8] L. Ma, J. Xu, J. Zhang, Z. Liu, X. Liu, Rare earth material CeO<sub>2</sub> modified CoS<sub>2</sub> nanospheres for efficient photocatalytic hydrogen evolution, *New Journal of Chemistry*, 45 (2021) 21795-21806.
